# Supplementary material for: Formation of three-dimensional tubular endothelial cell networks under defined serum-free cell culture conditions in human collagen hydrogels
Source: PubMed Central journal article supplement (PMC6443732; doi:10.1038/s41598-019-41985-6), 2019-04-01
Supplement: 41598_2019_41985_MOESM4_ESM.pdf [file 41598_2019_41985_MOESM4_ESM.pdf]

## Formation of three-dimensional tubular endothelial cell networks under defined serum-free cell culture conditions in human collagen hydrogels

Birgit Andrée<sup>a,1</sup>, Houda Ichanti<sup>a,1</sup>, Stefan Kalies<sup>b,c</sup>, Alexander Heisterkamp<sup>b,c</sup>, Sarah Strauß<sup>d</sup>, Peter-Maria Vogt<sup>d</sup>, Axel Haverich<sup>a</sup>, Andres Hilfiker<sup>a\*</sup>

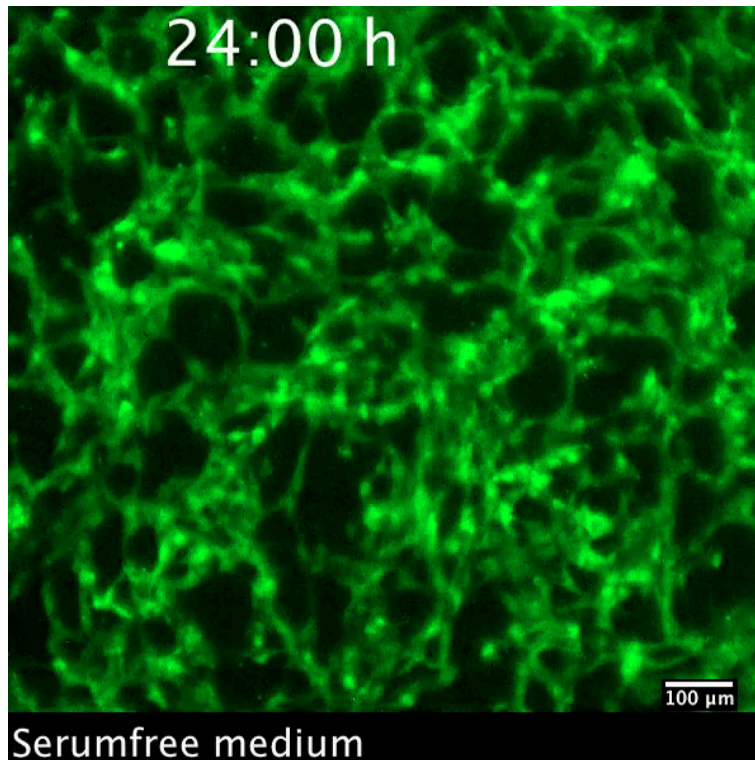

### Supplemental movie 1:

#### Network formation of GFP-HUVECs starts from day 3 onwards resulting in a stable and stationary spatial arrangement.

Time-lapse movie of network formation of GFP-HUVECs in 3D constructs containing hASCs, Matrigel/rCOL, and cultivation in SFM. Time-lapse was started 24 hours after construct generation and recorded for 7 days. Medium was exchanged every 3 days (jumps in movie). Initial network formation started at day 2-3. Re-arrangement of the initial network was very limited and GFP-HUVEC movement was only observed along the existing cords. Scale bar: 200 μm

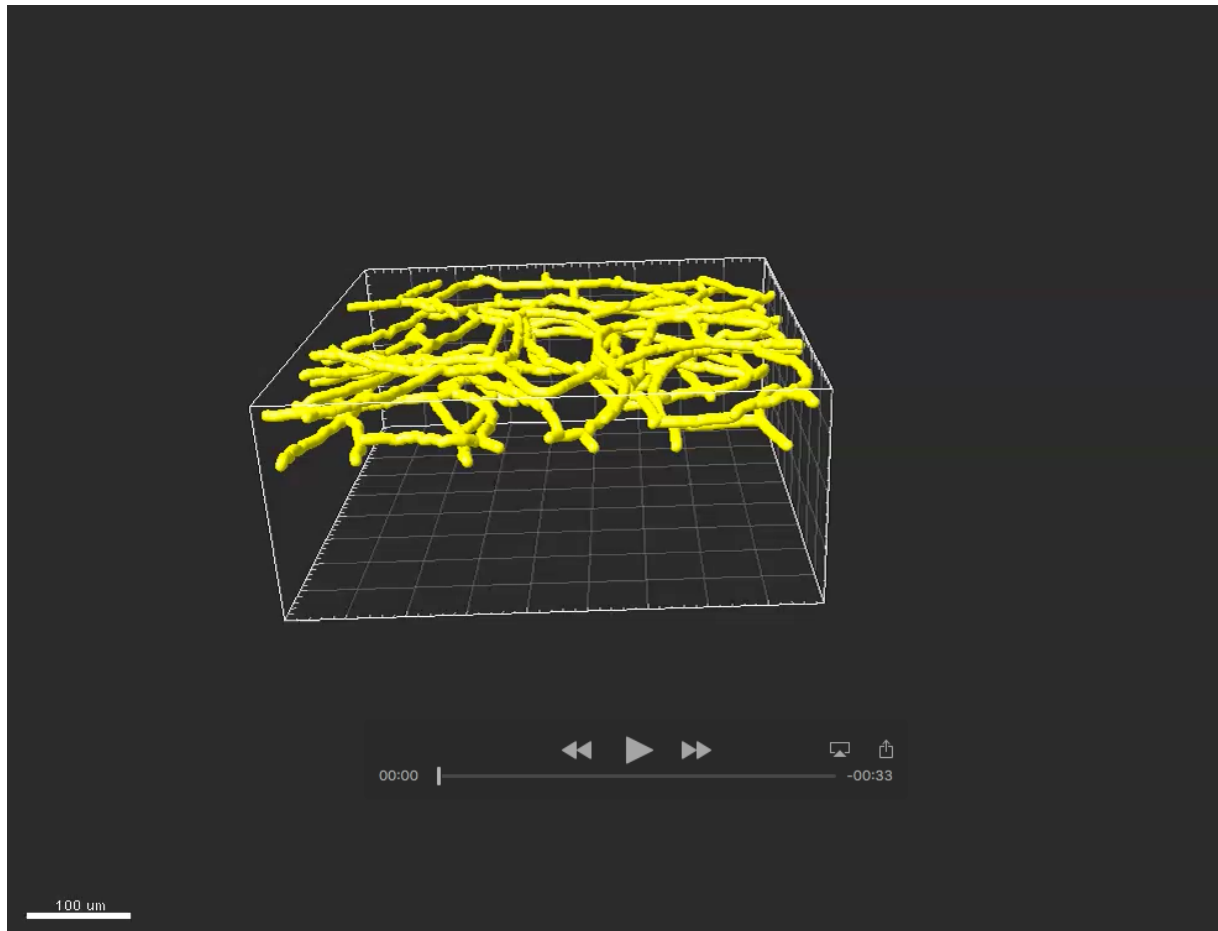

**Supplemental movie 2:**

Movie of the 3D reconstruction of multiphoton images obtained from constructs containing GFP-HUVECs and hASCs and Matrigel/rCOL. The calculated mean diameter is displayed. A multi-layered network is visible. Scale bar: 100  $\mu\text{m}$

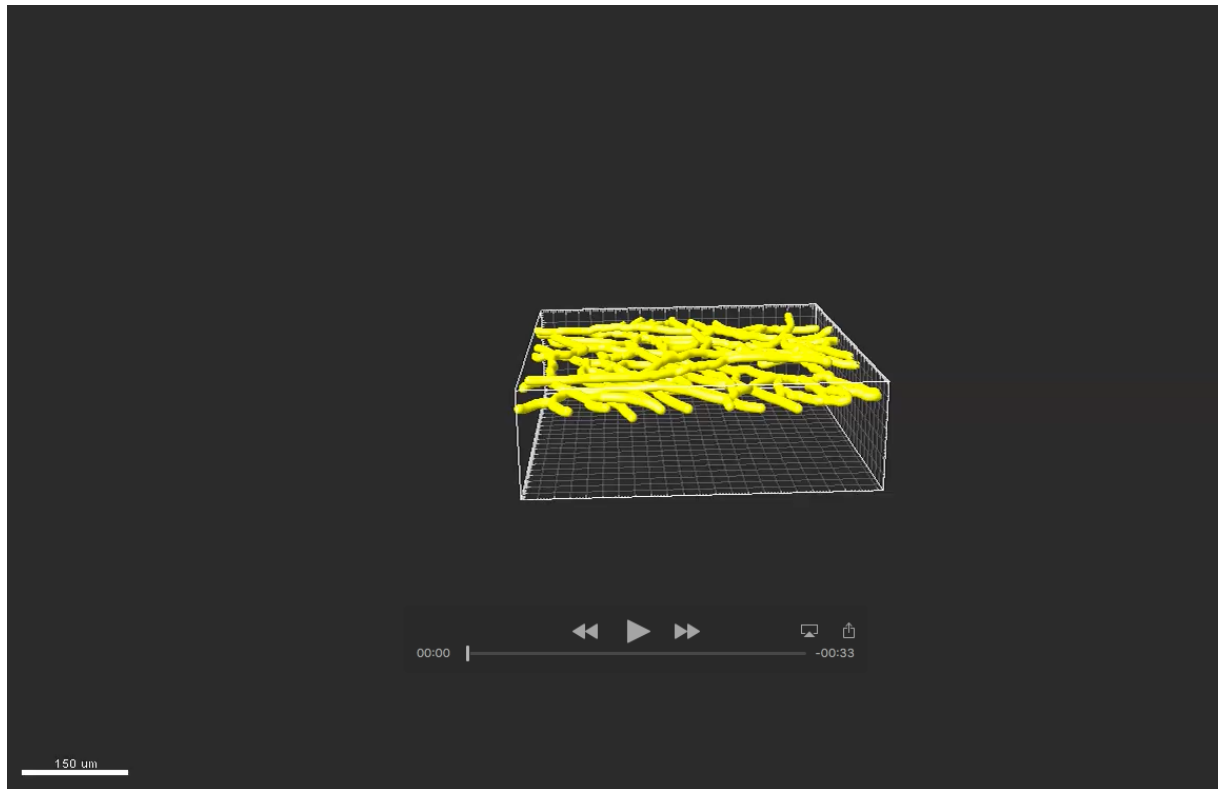

**Supplemental movie 3:**

Movie of the 3D reconstruction of multiphoton images obtained from constructs containing GFP-HUVECs and hASCs and hCOL. The calculated mean diameter is displayed. A multi-layered network is visible. Scale bar: 100  $\mu\text{m}$
